# Supplementary material
Source: Research Square preprint supplement (doi:10.21203/rs.3.rs-8837885/v1)
Supplement: Supplementary file 1 [file a2e22b4a0b359f69b0090b54.docx]

**A novel 2-hydroxyisobutyrylation signaling pathway drives fluoroquinolone resistance in *Staphylococcus aureus***

Yun Liu, Zhen Wang, Jiamin Qiu, Haiming Wu, Jiayi Wu, Tairan Zhong, Yundan Zheng, Nan Li, Yunpeng Yang, Zhenghua Sun, Qing-Yu He, Xuesong Sun,

**Supplementary Information**

**This Supplementary Information file contains:**

**Fig. S1:** Enrichment analyses of 2-hydroxyisobutyrylated proteins in *S. aureus*.

**Fig. S2:** Peptide motif with conserved residues around Khib sites was analyzed using the Motif-X tool.

**Fig. S3:** Preliminary exploration of AcuA as a lysine 2-hydroxyisobutyryltransferase.

**Fig. S4:** Enrichment analysis of differentially expressed proteins in CIP-R Δ*acuA* versus CIP-R strain.

**Fig. S5:** AcuA regulates the biofilm operon of *S. aureus*.

**Fig. S6:** 2-hydroxyisobutyrylation alters the conformation of the CodY DNA-binding domain (DBD).

**Table S1:** MIC of clinical multidrug-resistant (MDR) strains.

**Table S2:** The transcription regulatory factors with differentiate Khib modification levels in CIP-R are listed.

**Table S3:** Bacterial strains and plasmids used in this study.

**Table S4:** Oligonucleotides used in this study.


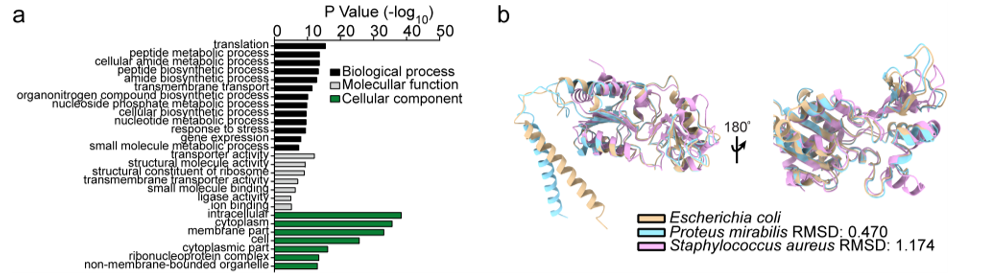


**Fig. S1: Enrichment analyses of 2-hydroxyisobutyrylated proteins in *S. aureus.***

**a.** GO-based enrichment analysis of identified proteins. The value of -log10 (Fisher’s test p-value) is shown. **b.** Structure alignment of CobB from *S. aureus*, *E. coli*, and *P. mirabilis* using ChimeraX.


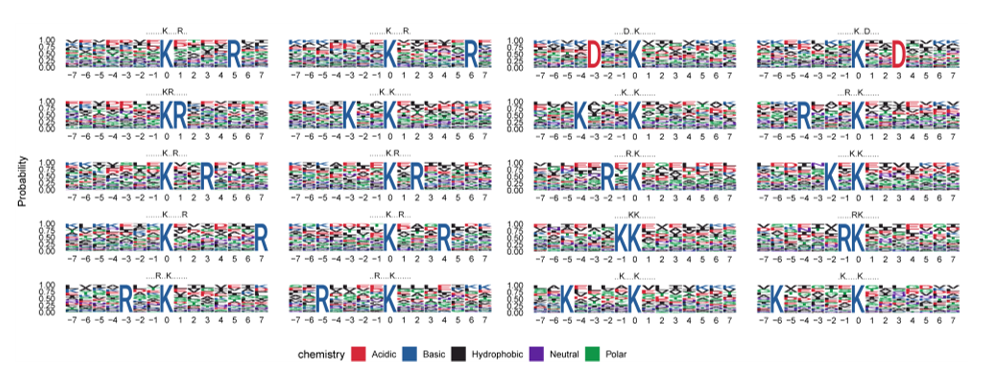


**Fig. S2: Peptide motif with conserved residues around Khib sites was analyzed using the Motif-X tool.**


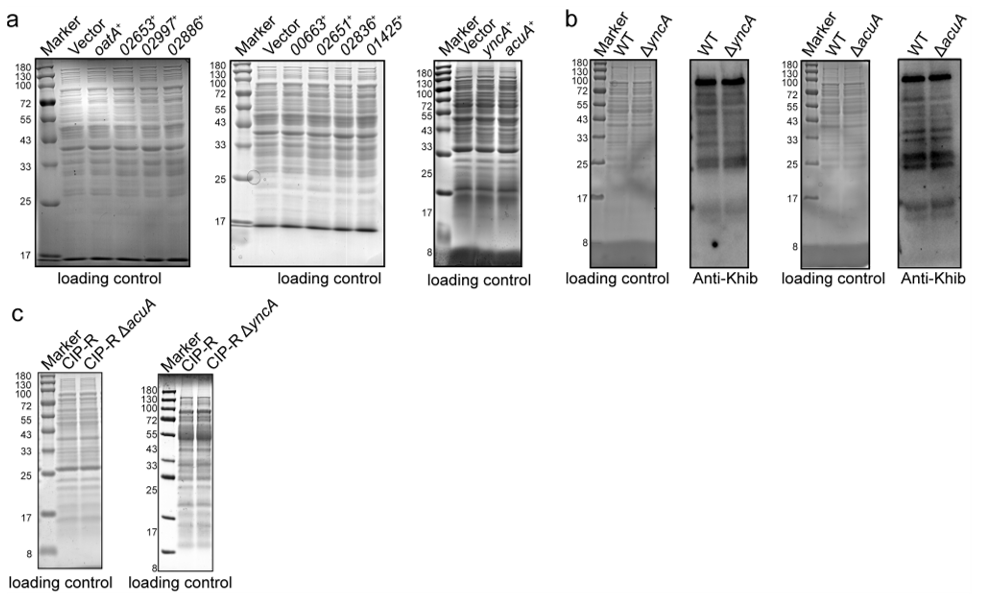


**Fig. S3: Preliminary exploration of AcuA as a lysine 2-hydroxyisobutyryltransferase.**

**a.** SDS-PAGE showing the loading control for whole-cell lysates from *S. aureus* NCTC 8325 strains containing overexpression plasmids. **b.** Western blot detection of Khib levels in whole-cell lysates of the WT knockout strains (Δ*yncA* and Δacu*A*) and compared with those of the WT strain. **c.** SDS-PAGE showing the loading control for whole-cell lysates from CIP-R and knockout strains (CIP-R Δ*yncA* and CIP-R Δacu*A*).


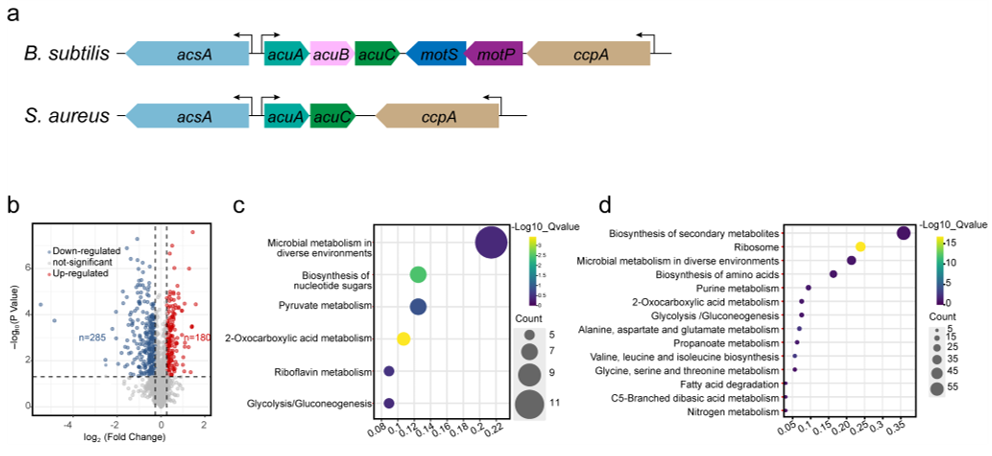


**Fig. S4: Enrichment analysis of differentially expressed proteins in CIP-R Δ*acuA* versus CIP-R strain.**

**a.** Schematics of the *acuABC* operon in *S. aureus* and *B. subtilis*. **b.** Volcano plot displaying differential proteins in CIP-R Δ*acuA* compared to the control strain (CIP-R). **c-d.** KEGG pathway enrichment analysis of upregulated (c) and downregulated (d) proteins in CIP-R Δ*acuA*.


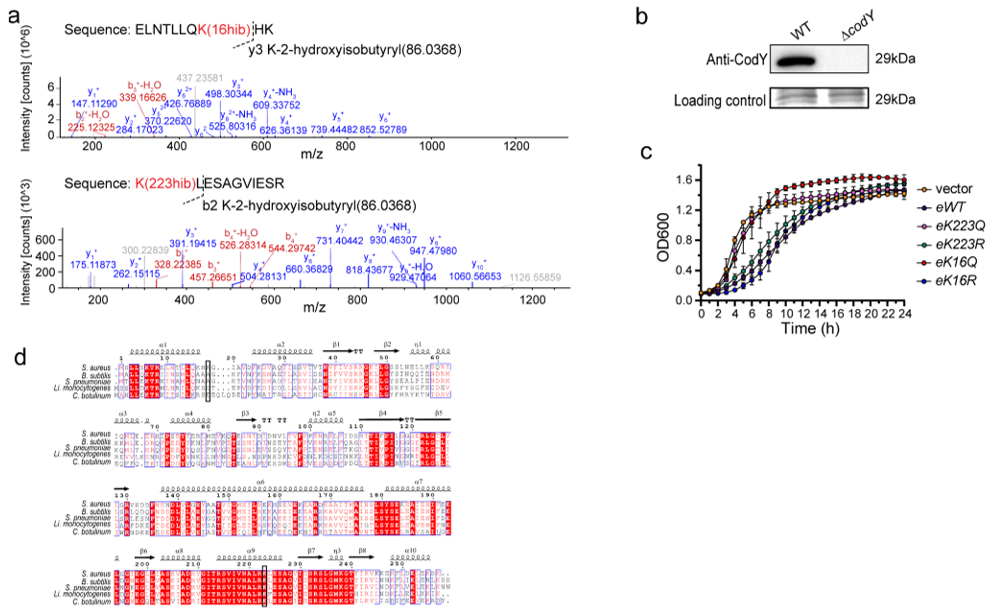


**Fig. S5: AcuA regulates the biofilm operon of *S. aureus*.**

**a.** MS/MS spectrum of the peptides (ELNTLLQK(16hib)HK) and (K(223hib)LESAGVIESR) from the CIP-R proteome. **b.** Western blot analysis of CodY knockout in *S. aureus*. **c.** Growth curves of CodY and its mutant strains in CD medium. **d.** Multiple sequence alignment of CodY from different species by Clustal W and visualized using ESPript3.


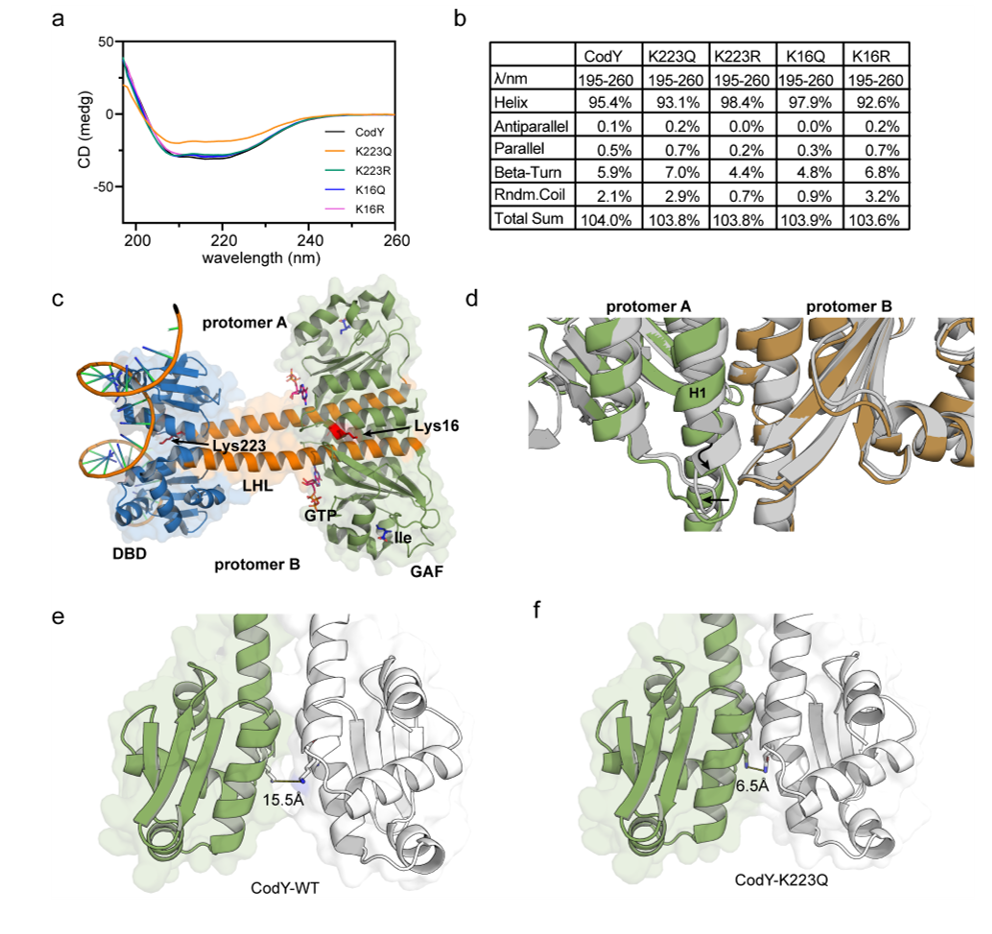


**Fig. S6: 2-hydroxyisobutyrylation alters the conformation of the CodY DNA-binding domain (DBD).**

**a-b.** Circular dichroism (CD) analysis evaluating the conformation of CodY mutant proteins. **c.** Lys16 and Lys223 of CodY are located within the GAF domain and DBD domain. **d.** Ligand-binding induces extension of the H1 chain (marked with a wavy arrow), causing displacement of the Glu 15-Lys 18 residues to promote dimer formation (marked with a straight arrow). Two ligand-free CodY monomers (green and yellow) were overlayed with an Ile/GTP-bound CodY dimer (grey). **e-f.** Structural and distant changes in the DBD domain induced by the K223Q mutation. (e) Wild-type CodY. (f) K223Q mutant. K223 is shown in red.

**Table S1.** MIC of clinical multidrug-resistant (MDR) strains.

| **MIC (μg/mL)** | **Clinical multidrug-resistant *S. aureus*** | | | | |
| --- | --- | --- | --- | --- | --- |
| **C1** | **C2** | **C3** | **C4** | **C5** |
| Oxacillin | 4 | 4 | >2 | >4 | 2 |
| Penicillium | 0.5 | 0.5 | >0.25 | >0.5 | 0.25 |
| Gentamicin | 16 | 16 | >8 | >16 | 8 |
| Levofloxacin | 8 | 8 | ND | >8 | ND |
| Moxifloxaicn | 1 | 8 | ND | ND | ND |
| Ciprofloxacin | ND | ND | >4 | ND | 4 |
| Clindamycin | 4 | 4 | >2 | >4 | 2 |
| Erythromycin | 8 | 8 | >4 | >8 | 4 |

ND: Not detected

**Table S2. The transcription regulatory factors with differentiate Khib modification levels in CIP-R are listed.**

| **Gene name** | **Uniprot ID** | **Fold Change (CIP-R/WT)** | **Protein description** |
| --- | --- | --- | --- |
| ***codY*** | **Q2FZ27** | **1.63** | **Global transcriptional regulator CodY** |
| *SAOUHSC_02913* | Q2FV26 | 1.71 | HTH tetR-type domain-containing protein |
| ***SAOUHSC_02852*** | **Q2FV83** | **2.32** | **HTH lysR-type domain-containing protein** |
| *SAOUHSC_02585* | Q2FVV6 | 1.50 | HTH deoR-type domain-containing protein |
| *cspA* | Q2FUQ9 | 0.42 | Cold shock protein CspA |
| *rex* | Q2FWL6 | 1.41 | Redox-sensing transcriptional repressor Rex |
| ***nreC*** | **Q2FVM7** | **1.78** | **Oxygen regulatory protein NreC** |
| *SAOUHSC_01285* | Q2FYY7 | 0.48 | HTH merR-type domain-containing protein |
| *SAOUHSC_01490* | Q2FYG2 | 1.55 | DNA-binding protein HU, putative |
| *SAOUHSC_00892* | Q2FZU8 | 1.65 | S1 motif domain-containing protein |
| *birA* | Q2G258 | 1.80 | Bifunctional ligase/repressor BirA |
| ***SAOUHSC_00638*** | **Q2G2L0** | **1.61** | **Manganese transport regulator** |
| *walR* | Q2G2U6 | 0.65 | Transcriptional regulatory protein WalR |
| *graR* | Q2G0E0 | 1.43 | Response regulator protein GraR |
| *vraR* | Q2FX09 | 1.48 | Response regulator protein VraR |
| ***SAOUHSC_00679*** | **Q2G0C6** | **1.41** | **HTH lysR-type domain-containing protein** |
| *SAOUHSC_00673* | Q2G0D2 | 2.65 | HTH araC/xylS-type domain-containing protein |
| ***SAOUHSC_00434*** | **Q2G0U3** | **2.01** | **Transcriptional regulator, lysR family, putative** |
| *SAOUHSC_00706* | Q2G240 | 1.82 | HTH deoR-type domain-containing protein |
| *sarA* | | Q2G2U9 | 1.86 | Transcriptional regulator SarA |
| *SAOUHSC_00631* | Q2G2W4 | 2.14 | HTH tetR-type domain-containing protein |
| ***rot*** | **Q9RFJ6** | **0.43** | **HTH-type transcriptional regulator rot** |
| *SAOUHSC_02961* | | Q2FUY4 | 1.82 | HTH marR-type domain-containing protein |
| *sarX* | | Q2G0D1 | 3.14 | HTH-type transcriptional regulator SarX |

Potential interacting proteins of AcuA are indicated in bold.

**Table S3. Bacterial strains and plasmids used in this study.**

| **Strains/plasmids** | **Relevant genotype and property** | **Source/reference** |
| --- | --- | --- |
| ***E. coli*** |  |  |
| DH5α | *endA1 recA1 gyrA96 thi-1 hsdR17 (rKmK+) relA1 supE44 (lacZYA-argF) U169 F-80dlacZM15 deoR phoA* | Invitrogen |
| BL21 (DE3) | Expression strain, *F-, ompT, hsdS (rBB-mB－), gal, dcm(DE3)* | Invitrogen |
| DC10B | *mcrA ∆(mrr-hsdRMS-mcrBC) ϕ80lacZ∆M15 ∆lacX74 recA1 araD139 ∆(ara-leu)7697 galU galK rpsL endA1 nupG dcm-* | BEI Resources |
| ***S. aureus*** |  |  |
| NCTC8325 | Rrototypical strain for all genetic manipulation | Laboratory stock |
| NCTC8325 (*pCN51*) | NCTC8325 transformed with pCN51, *ermR* | This study |
| NCTC8325 (*pCN51-oatA*) | NCTC8325 transformed with pCN51-*oatA*, *ermR* | This study |
| NCTC8325 (*pCN51-oatA*) | | NCTC8325 transformed with pCN51-*oatA*, *ermR* | This study |
| NCTC8325 (*pCN51-02653*) | | NCTC8325 transformed with pCN51-*02653*, *ermR* | This study |
| NCTC8325 (*pCN51-02997*) | | NCTC8325 transformed with pCN51-*02997*, *ermR* | This study |
| NCTC8325 (*pCN51-02886*) | | NCTC8325 transformed with pCN51-*02886*, *ermR* | This study |
| NCTC8325 *(pCN51-00663)* | | NCTC8325 transformed with pCN51-*00663*, *ermR* | This study |
| NCTC8325 (*pCN51-02651*) | | NCTC8325 transformed with pCN51-*02651*, *ermR* | This study |
| NCTC8325 (*pCN51-02836*) | | NCTC8325 transformed with pCN51-*02836*, *ermR* | This study |
| NCTC8325 (*pCN51-01425*) | | NCTC8325 transformed with pCN51-*01425*, *ermR* | This study |
| NCTC8325 (*pCN51-acuA*) | | NCTC8325 transformed with pCN51-*acuA*, *ermR* | This study |
| NCTC8325 (*pCN51-yncA*) | | NCTC8325 transformed with pCN51-*yncA*, *ermR* | This study |
| NCTC8325 (*pCN51-acuAH139A*) | | NCTC8325 transformed with pCN51-*acuA*H139A, *ermR* | This study |
| NCTC8325 (*pCN51-acuAW140A*) | | NCTC8325 transformed with pCN51-*acuA*W140A, *ermR* | This study |
| Δ*cobB* | *cobB* mutant through homologous recombination derived from NCTC8325 | This study |
| Δ*acuA* | *acuA* mutant through homologous recombination derived from NCTC8325 | This study |
| Δ*yncA* | *yncA* mutant through homologous recombination derived from NCTC8325 | This study |
| CIP-R | Derived from NCTC8325; Ciprofloxacin resistance | This study |
| CIP-R Δ*acuA* | *acuA* mutant through homologous recombination derived from CIP-R | This study |
| CIP-R Δ*yncA* | *yncA* mutant through homologous recombination derived from CIP-R | This study |
| CIP-R (*pCN51*) | CIP-R transformed with pCN51, *ermR* | This study |
| CIP-R (*pCN51-cobB*) | CIP-R transformed with pCN51-*cobB*, *ermR* | This study |
| RMSA24 | foodborne | 1 |
| Δ*codY* | *codY* mutant through transposon mutagenesis derived from RMSA24 | 1 |
| Δ*codY* (*pWWW412*) | Δ*codY* transformed with pWWW412, *cmR* | This study |
| Δ*codY* (*WWW412-codY*) | Δ*codY* transformed with pWWW412-CodY, *cmR* | This study |
| Δ*codY* (*pWWW412-CodYK6R*) | Δ*codY* transformed with pWWW412*-*CodYK6R, *cmR* | This study |
| Δ*codY* (*WWW412- CodYK16R*) | Δ*codY* transformed with pWWW412- CodYK16R, *cmR* | This study |
| Δ*codY* (*WWW412 CodYK223R*) | Δ*codY* transformed with pWWW412 CodYK223R, *cmR* | This study |
| Δ*codY* (*pWWW412 CodYK16Q*) | Δ*codY* transformed with pWWW412 CodYK16Q, *cmR* | This study |
| Δ*codY* (*pWWW412 CodYK223Q*) | Δ*codY* transformed with pWWW412 CodYK223Q, *cmR* | This study |
| C1-C5 | clinical isolate | This study |
| **Plasmids** |  |  |
| *pWWW412* | *E. coli/Staphylococcus* shuttle cloning plasmid, *cmR*, *ampR* | 2 |
| *pKOR1* | *cmR and ampR*, temperature-sensitive vector for allelic replacement via lambda recombination and *ccdB* selection | NovoPro |
| *pCN51* | *E. coli/Staphylococcus* shuttle cloning plasmid, *ermR*, *ampR* | NovoPro |
| *pET28a* | | Expression vector with His-tag, *kanR* | Novagen |
| pGEX-4T-1 vector | Expression vector with GST-tag, *ampR* | Solarbio |
| pET28a-*acuA* | *acuA* cloned into pET28a, *kanR* | This study |
| pET28a-*acuAH139A* | | *acuA* (139H→A) cloned into pET28a, *kanR* | This study |
| pET28a-*acuAW140A* | *acuA* (140W→A) cloned into pET28a, *kanR* | This study |
| pET28a-*codY* | | *codY* cloned into pET28a, *kanR* | This study |
| pET28a-*codYK6R* | | *codY* (6K→R) cloned into pET28a, *kanR* | This study |
| pET28a-*codYK16R* | | *codY* (16K→R) cloned into pET28a, *kanR* | This study |
| pET28a-*codYK223R* | | *codY* (223K→R) cloned into pET28a, *kanR* | This study |
| pET28a-*codYK16Q* | | *codY* (16Q→R) cloned into pET28a, *kanR* | This study |
| pET28a-*codYK223Q* | | *codY* (223Q→R) cloned into pET28a, *kanR* | This study |
| pGEX-4T-1-*acuA* | *acuA* cloned into PGEX-4T-1, *ampR* | This study |

**Table S4. Oligonucleotides used in this study.**

| **Oligonucleotide** | **Sequence** |
| --- | --- |
| **Oligonucleotides for isogenic deletion mutants** | |
| *cobB*-up-F | GGGGACAAGTTTGTACAAAAAAGCAGGCTAATTTAGTCGACTACTTCAATATATGTTTTAAT |
| *cobB*-up-R | GCTTTTTACATACTGACCCATCAAAATAATGAATGATTTATAACG |
| *cobB*-down-F | TGGGTCAGTATGTAAAAAGCATTTCCCG |
| *cobB*-down-R | GGGGACCACTTTGTACAAGAAAGCTGGGTACATGGTGGTTCTTATTGGAAGTTAA |
| *yncA*-up-F | GGGGACAAGTTTGTACAAAAAAGCAGGCTAAGTAGAAAGAGATGGTTGAAAATC |
| *yncA* -up-R | GGGAATTAACATGGTTGTCTTGGCGTATCTAATCATATCAATTCCCC |
| *yncA* -down-F | CAAGACAACCATGTTAATTCCCGTGTTATGAGAAATGCAATTGG |
| *yncA* -down-R | GGGGACCACTTTGTACAAGAAAGCTGGGT |
| *acuA*-up-F | GGGGACAAGTTTGTACAAAAAAGCAGGCTCCAGCTATACAATTTGTAGCGCC |
| *acuA* -up-R | AATCCCTCCGATATTCCAAAAAATTTTCAACTCCTCAATCGAC |
| *acuA* -down-F | TTTTTGGAATATCGGAGGGATTATATG |
| *acuA* -down-R | GGGGACCACTTTGTACAAGAAAGCTGGGTGATCAATTAAACTTAAGAATACATGACTCC |
| **Oligonucleotides for constructing AcuA and its mutants expression strains** | |
| *pET28a-acuA*-F | GGGGATCCATGAATCATTTAAAGACGTATCAA |
| *pET28a-acuA*-R | GGGAGCTCTTAAAAGAAAAACCGATTCATATAAC |
| H140A-F | CTGGCATGCGGATTTAAAAAATTCAAAG |
| H140A-R | TTAAATCCGGATGCCAGTAATATTCTGTAG |
| H139A-F | TTACTGGGCTTGGGATTTAAAAAATTCAAAG |
| H139A-R | AATCCCAAGCCCAGTAATATTCTGTAGTTAT |
| *pGEX-acuA*-F | GGGGATCCATGAATCATTTAAAGACGTATCAA |
| *pGEX-acuA*-R | GCTCGAGTTAAAAGAAAAACCGATTCATATAAC |
| **Oligonucleotides for constructing CodY and its mutants expression and complementary strains** | |
| *pET28a-codY*-F | GGGGATCCATGAGCTTATTATCTAAAACGAG |
| *pET28a-codY-*R | GGGAGCTCTTATTTACTTTTTTCTAATTCATCTAAG |
| *pWWW412-codY*-F | ACAATTGAGGTGAACATATGATGAGCTTATTATCTAAAACGAG |
| *pWWW412-codY-*R | CAAGCTTGTCGACGGAGCTCTTATTTACTTTTTTCTAATTCATCTAAG |
| K6R-F | ATTATCTACAACGAGAGAGTTAAACACGTTAC |
| K6R-R | CTCTCTCGTTCTAGATAATAAGCTCATGGATCCG |
| K16R-F | ACTTCAAAGACACAAAGGTATTGCGGTTGA |
| K16R-R | CTTTGTGTCTTTGAAGTAACGTGTTTAACTCTCTC |
| K16Q-F | ACTTCAACAACACAAAGGTATTGCGGTTGA |
| K16Q-R | CTTTGTGTTGTTGAAGTAACGTGTTTAACTCTCTCG |
| K223R-F | ACTACGTAGATTAGAAAGTGCTGGTGTAATTG |
| K223R-R | TTTCTAATCTACGTAGTGCATTTACAATTAC |
| K223Q-F | ACTACGTCAATTAGAAAGTGCTGGTGTAATTG |
| K223Q-R | TTTCTAATTGACGTAGTGCATTTACAATTAC |
| **Oligonucleotides for constructing overexpression strains containing GNATs in *S. aureus*** | |
| *pCN51-oatA*-F | CGGGATCCATGGATACAAAAGACTTTAAACGTT |
| *pCN51-oatA*-R | CGGAATTCTCATTTCTTATTTGTAGCATGTGTTTCC |
| *pCN51-02653*-F | CGGGATCCATGAGTCCAAAGACGCGCGAA |
| *pCN51-02653*-R | CGGAATTCTCAGTATTTGATATACATACCGCCTGAATCTGGT |
| *pCN51-02997*-F | CGGGATCCATGGTATTAAGAAAAGTAATCATGCAG |
| *pCN51-02997*-R | CGGAATTCTTACACCTCATCATCCTTTTTTAT |
| *pCN51-02886*-F | CGGGATCCATGGCTATAAACATAATTGAATATAATAG |
| *pCN51-02886*-R | CGGAATTCTTAATCTTTTAAATTTCTGTAATAAAACC |
| *pCN51-00663*-F | CGGGATCCATGGCCCATATTATACGTAGAGTT |
| *pCN51-00663*-R | CGGAATTCTTAATTAAGAATTTTAGCCATCATATAGTC |
| *pCN51-02651*-F | CGGGATCCATGGCTGGGATAATCAAAGAAATT |
| *pCN51-02651*-R | CGGAATTCTAACTCTTTTTCCATAATTAAATCTGTATCC |
| *pCN51-02836*-F | CGGGATCCATGATTAGATACGCTAAAAAAGAG |
| *pCN51-02836*-R | CGGAATTCTCAATTTTACGAATTAGATTTACAAGAC |
| *pCN51-01425*-F | CGGGATCCATGATCCGTCTAGGTAAAATGTCAG |
| *pCN51-01425*-R | CGGAATTCCTATTCTTTTAAATTTTTATAATATGC |
| *pCN51-acuA*-F | CGGGATCCATGAATCATTTAAAGACGTATCAA |
| *pCN51-acuA*-R | CGGAATTCTTAAAAGAAAAACCGATTCATATAAC |
| *pCN51-yncA*-F | CGGGATCCATGATTAGATACGCTAAAAAAGAGG |
| *pCN51-yncA*-R | CGGAATTCCTAGTCTTGTAAATCTAATTCGT |
| **Oligonucleotides for constructing CobB overexpression strains** | |
| *pCN51-cobB*-F | CGGGATCCGTGTTTAACTTGAAACATGATTTAGAG |
| *pCN51-cobB*-R | CGGAATTCTTACTCTGTCATTAATGATTTTACAAC |
| **Oligonucleotides for EMSAs analysis** | |
| *cap-EMSA*-F | GTCGATAATCATTATACGGTTATCGGC |
| *cap-EMSA*-R | GACGAAAAATGTAACAATAGCGC |
| *ica-EMSA*-F | GAGATTCAAATTGTGATTGACTAACAC |
| *ica-EMSA*-R | GCAAATGCAGATGACGATTC |
| **Oligonucleotides for qRT-PCR analysis** | |
| *icaA-qP*-F | GACGTTGGCTACTGGGATAC |
| *icaA-qP*-R | ATACTTCGTGTCCCCCTTGAG |
| *icaB qP*-F | CGGTAATCAAAAAAGCTGGG |
| *icaB-qP*-R | TTCATGGAATCCGTCCCATC |
| *icaR-qP*-F | CTTTCTTCCACTGCTCCAAA |
| *icaR-qP*-R | TTCAATTATCTAATACGCCTGAGG |

**Supplementary references**

1. Pei, H. *et al.* CodY: An Essential Transcriptional Regulator Involved in Environmental Stress Tolerance in Foodborne Staphylococcus aureus RMSA24. *Foods* **12**, 3166 (2023).

2. Bobrovskyy, M., Oh, S. Y. & Missiakas, D. Contribution of the EssC ATPase to the assembly of the type 7b secretion system in Staphylococcus aureus. *JBC* **298**, 102318 (2022).
